# Supplementary material for: Conditional crude probabilities of death for English cancer patients
Source: PubMed Central journal article supplement (PMC6889443; doi:10.1038/s41416-019-0597-0), 2019-10-11
Supplement: 41416_2019_597_MOESM1_ESM.pdf [file 41416_2019_597_MOESM1_ESM.pdf]

|                   | Estimated % of deaths in the cohort, following 5 years from diagnosis of cancer |                                                             |                                                            |                                                         |
|-------------------|---------------------------------------------------------------------------------|-------------------------------------------------------------|------------------------------------------------------------|---------------------------------------------------------|
|                   | 1 – Net Survival*                                                               | Cumulative Mortality % due to Cancer deaths (Unconditional) | Cumulative Mortality % due to Other deaths (Unconditional) | Cumulative Mortality % due to any death (Unconditional) |
| <i>Breast</i>     |                                                                                 |                                                             |                                                            |                                                         |
| 15-44             | 13.0%                                                                           | 13.0%                                                       | 0.5%                                                       | 13.5%                                                   |
| 45-54             | 8.7%                                                                            | 8.6%                                                        | 1.1%                                                       | 9.7%                                                    |
| 55-64             | 8.4%                                                                            | 8.3%                                                        | 2.9%                                                       | 11.2%                                                   |
| 65-74             | 10.6%                                                                           | 10.3%                                                       | 7.1%                                                       | 17.4%                                                   |
| 75-99             | 31.6%                                                                           | 26.5%                                                       | 25.3%                                                      | 51.8%                                                   |
| <i>Colorectal</i> |                                                                                 |                                                             |                                                            |                                                         |
| 15-44             | 32.0%                                                                           | 32.0%                                                       | 0.4%                                                       | 32.4%                                                   |
| 45-54             | 36.1%                                                                           | 36.0%                                                       | 1.3%                                                       | 37.3%                                                   |
| 55-64             | 33.8%                                                                           | 33.4%                                                       | 3.2%                                                       | 36.6%                                                   |
| 65-74             | 36.3%                                                                           | 35.3%                                                       | 7.7%                                                       | 43.0%                                                   |
| 75-99             | 54.2%                                                                           | 50.3%                                                       | 18.4%                                                      | 68.7%                                                   |
| <i>Lung</i>       |                                                                                 |                                                             |                                                            |                                                         |
| 15-44             | 68.4%                                                                           | 68.4%                                                       | 0.3%                                                       | 68.7%                                                   |
| 45-54             | 82.0%                                                                           | 81.8%                                                       | 0.6%                                                       | 82.4%                                                   |
| 55-64             | 84.3%                                                                           | 83.8%                                                       | 1.3%                                                       | 85.1%                                                   |
| 65-74             | 85.9%                                                                           | 84.6%                                                       | 3.0%                                                       | 87.6%                                                   |
| 75-99             | 92.2%                                                                           | 88.0%                                                       | 6.7%                                                       | 94.7%                                                   |
| <i>Melanoma</i>   |                                                                                 |                                                             |                                                            |                                                         |
| 15-44             | 5.3%                                                                            | 5.3%                                                        | 0.4%                                                       | 5.7%                                                    |
| 45-54             | 7.7%                                                                            | 7.6%                                                        | 1.3%                                                       | 8.9%                                                    |
| 55-64             | 10.2%                                                                           | 10.1%                                                       | 3.4%                                                       | 13.5%                                                   |
| 65-74             | 12.1%                                                                           | 11.6%                                                       | 8.7%                                                       | 20.3%                                                   |
| 75-99             | 21.6%                                                                           | 18.0%                                                       | 29.5%                                                      | 47.5%                                                   |
| <i>Prostate</i>   |                                                                                 |                                                             |                                                            |                                                         |
| 15-54             | 7.6%                                                                            | 7.5%                                                        | 1.9%                                                       | 9.4%                                                    |
| 55-64             | 7.2%                                                                            | 7.1%                                                        | 4.6%                                                       | 11.7%                                                   |
| 65-74             | 8.2%                                                                            | 7.8%                                                        | 10.9%                                                      | 18.7%                                                   |
| 75-84             | 20.7%                                                                           | 17.9%                                                       | 24.5%                                                      | 42.4%                                                   |
| 85-99             | 51.3%                                                                           | 39.9%                                                       | 39.5%                                                      | 79.4%                                                   |

\*Net survival estimates were obtained from the same analysis as those published on ONS<sup>2</sup>, but recreated using period approach.

Table S1: Comparison of published net survival estimates to cumulative probabilities of death due to cancer, during the period 2011-2015.

| Cumulative Mortality % at X years following a diagnosis of cancer |                   |                  |                     |                     |                     |                     |
|-------------------------------------------------------------------|-------------------|------------------|---------------------|---------------------|---------------------|---------------------|
| Age Group                                                         | 1 Year(s)         |                  | 5 Year(s)           |                     | 10 Year(s)          |                     |
|                                                                   | Cancer Deaths     | Other Causes     | Cancer Deaths       | Other Causes        | Cancer Deaths       | Other Causes        |
| <b>Breast</b>                                                     |                   |                  |                     |                     |                     |                     |
| <i>Unconditional</i>                                              |                   |                  |                     |                     |                     |                     |
| 15-44                                                             | 1.5% (1.4 – 1.7)  | 0.1% (0.1 – 0.1) | 13.0% (12.5 – 13.5) | 0.5% (0.5 – 0.5)    | 20.2% (19.5 – 21.0) | 1.1% (1.1 – 1.1)    |
| 45-54                                                             | 1.3% (1.2 – 1.4)  | 0.2% (0.2 – 0.2) | 8.6% (8.3 – 8.9)    | 1.1% (1.1 – 1.1)    | 14.2% (13.6 – 14.8) | 2.7% (2.7 – 2.7)    |
| 55-64                                                             | 1.6% (1.5 – 1.7)  | 0.5% (0.5 – 0.5) | 8.3% (8.0 – 8.6)    | 2.9% (2.9 – 2.9)    | 13.0% (12.4 – 13.6) | 7.1% (7.1 – 7.1)    |
| 65-74                                                             | 2.7% (2.5 – 2.9)  | 1.2% (1.2 – 1.2) | 10.3% (9.9 – 10.6)  | 7.1% (7.1 – 7.2)    | 15.5% (14.7 – 16.4) | 17.2% (17.1 – 17.2) |
| 75-99                                                             | 9.9% (9.6 – 10.3) | 6.0% (5.9 – 6.0) | 26.5% (26.0 – 27.1) | 25.3% (25.2 – 25.4) | 34.0% (33.1 – 35.0) | 42.3% (42.0 – 42.6) |
| <b>Breast</b>                                                     |                   |                  |                     |                     |                     |                     |
| <i>Conditional 1 Year(s)</i>                                      |                   |                  |                     |                     |                     |                     |
| 15-44                                                             |                   |                  | 11.6% (11.2 – 12.1) | 0.4% (0.4 – 0.4)    | 19.7% (19.1 – 20.3) | 1.0% (1.0 – 1.0)    |
| 45-54                                                             |                   |                  | 7.4% (7.2 – 7.7)    | 0.9% (0.9 – 0.9)    | 13.5% (13.1 – 13.9) | 2.6% (2.6 – 2.6)    |
| 55-64                                                             |                   |                  | 6.8% (6.5 – 7.1)    | 2.5% (2.5 – 2.5)    | 11.9% (11.5 – 12.3) | 6.7% (6.7 – 6.7)    |
| 65-74                                                             |                   |                  | 7.8% (7.5 – 8.2)    | 6.1% (6.1 – 6.2)    | 13.6% (13.0 – 14.1) | 16.8% (16.7 – 16.8) |
| 75-99                                                             |                   |                  | 19.8% (19.2 – 20.4) | 23.0% (22.9 – 23.1) | 28.8% (28.1 – 29.5) | 43.1% (42.8 – 43.4) |
| <b>Breast</b>                                                     |                   |                  |                     |                     |                     |                     |
| <i>Conditional 5 Year(s)</i>                                      |                   |                  |                     |                     |                     |                     |
| 15-44                                                             |                   |                  |                     |                     | 9.2% (8.7 – 9.6)    | 0.7% (0.7 – 0.7)    |
| 45-54                                                             |                   |                  |                     |                     | 6.6% (6.3 – 6.9)    | 1.8% (1.8 – 1.8)    |
| 55-64                                                             |                   |                  |                     |                     | 5.6% (5.3 – 5.9)    | 4.7% (4.7 – 4.7)    |
| 65-74                                                             |                   |                  |                     |                     | 6.7% (6.2 – 7.2)    | 12.4% (12.3 – 12.7) |
| 75-99                                                             |                   |                  |                     |                     | 15.8% (16.7 – 35.1) | 35.1% (34.9 – 35.4) |

Table S2: Cumulative probability partitioned by deaths due to cancer and other causes, during the period 2011 to 2015, for female breast cancer patients.

| Cumulative Mortality % at X years following a diagnosis of cancer |                     |                  |                     |                     |                     |                     |
|-------------------------------------------------------------------|---------------------|------------------|---------------------|---------------------|---------------------|---------------------|
| Age Group                                                         | 1 Year(s)           |                  | 5 Year(s)           |                     | 10 Year(s)          |                     |
|                                                                   | Cancer Deaths       | Other Causes     | Cancer Deaths       | Other Causes        | Cancer Deaths       | Other Causes        |
| <b>Colorectal Unconditional</b>                                   |                     |                  |                     |                     |                     |                     |
| 15-44                                                             | 12.0% (11.1 – 12.8) | 0.1% (0.1 – 0.1) | 32.0% (30.7 – 33.3) | 0.4% (0.4 – 0.4)    | 36.9% (35.2 – 38.5) | 1.0% (1.0 – 1.0)    |
| 45-54                                                             | 13.5% (12.9 – 14.2) | 0.3% (0.3 – 0.3) | 36.0% (35.0 – 36.6) | 1.3% (1.2 – 1.3)    | 41.1% (39.9 – 42.3) | 2.8% (2.7 – 2.8)    |
| 55-64                                                             | 14.3% (13.9 – 14.7) | 0.6% (0.6 – 0.6) | 33.4% (32.9 – 34.0) | 3.2% (3.2 – 3.2)    | 38.9% (38.0 – 39.8) | 7.2% (7.2 – 7.3)    |
| 65-74                                                             | 17.9% (17.5 – 18.2) | 1.6% (1.6 – 1.6) | 35.3% (34.8 – 35.8) | 7.7% (7.6 – 7.7)    | 40.1% (39.3 – 40.9) | 16.9% (16.7 – 17.0) |
| 75-99                                                             | 34.0% (33.6 – 34.4) | 5.1% (5.1 – 5.2) | 50.3% (49.8 – 50.7) | 18.4% (18.3 – 18.5) | 52.7% (52.0 – 53.4) | 31.1% (30.9 – 31.4) |
| <b>Colorectal Conditional 1 Year(s)</b>                           |                     |                  |                     |                     |                     |                     |
| 15-44                                                             |                     |                  | 22.8% (21.5 – 24.0) | 0.4% (0.4 – 0.4)    | 28.9% (27.4 – 30.3) | 1.0% (1.0 – 1.1)    |
| 45-54                                                             |                     |                  | 26.0% (25.1 – 26.9) | 1.2% (1.1 – 1.2)    | 32.6% (31.6 – 33.7) | 2.9% (2.9 – 3.0)    |
| 55-64                                                             |                     |                  | 22.5% (22.0 – 23.1) | 3.0% (3.0 – 3.0)    | 28.8% (28.1 – 29.5) | 7.7% (7.6 – 7.7)    |
| 65-74                                                             |                     |                  | 21.6% (21.1 – 22.1) | 7.6% (7.6 – 7.6)    | 27.7% (27.1 – 28.3) | 19.0% (18.8 – 19.1) |
| 75-99                                                             |                     |                  | 26.8% (26.2 – 27.3) | 21.8% (21.7 – 21.9) | 31.4% (30.6 – 32.1) | 42.6% (42.3 – 42.9) |
| <b>Colorectal Conditional 5 Year(s)</b>                           |                     |                  |                     |                     |                     |                     |
| 15-44                                                             |                     |                  |                     |                     | 7.9% (6.8 – 9.1)    | 0.9% (0.8 – 0.9)    |
| 45-54                                                             |                     |                  |                     |                     | 9.1% (8.2 – 10.0)   | 2.4% (2.4 – 2.4)    |
| 55-64                                                             |                     |                  |                     |                     | 8.4% (7.8 – 9.0)    | 6.2% (6.2 – 6.3)    |
| 65-74                                                             |                     |                  |                     |                     | 8.6% (8.0 – 9.3)    | 16.1% (16.0 – 16.1) |
| 75-99                                                             |                     |                  |                     |                     | 8.9% (8.0 – 9.9)    | 40.4% (40.1 – 40.7) |

Table S3: Cumulative mortality partitioned by deaths due to cancer and other causes, during the period 2011 to 2015, for colorectal cancer patients.

| Cumulative Mortality % at X years following a diagnosis of cancer |                     |                  |                     |                     |                     |                     |  |
|-------------------------------------------------------------------|---------------------|------------------|---------------------|---------------------|---------------------|---------------------|--|
| Age Group                                                         | 1 Year(s)           |                  | 5 Year(s)           |                     | 10 Year(s)          |                     |  |
|                                                                   | Cancer Deaths       | Other Causes     | Cancer Deaths       | Other Causes        | Cancer Deaths       | Other Causes        |  |
| <b>Lung</b>                                                       |                     |                  |                     |                     |                     |                     |  |
| <i>Unconditional</i>                                              |                     |                  |                     |                     |                     |                     |  |
| 15-44                                                             | 45.4% (43.1 – 47.6) | 0.1% (0.1 – 0.1) | 68.4% (66.2 – 70.5) | 0.3% (0.3 – 0.3)    | 73.2% (69.4 – 76.7) | 0.5% (0.5 – 0.5)    |  |
| 45-54                                                             | 55.4% (54.4 – 56.5) | 0.2% (0.2 – 0.2) | 81.8% (81.0 – 82.7) | 0.6% (0.6 – 0.6)    | 85.9% (84.8 – 87.0) | 1.0% (1.0 – 1.0)    |  |
| 55-64                                                             | 57.9% (57.3 – 58.5) | 0.5% (0.5 – 0.5) | 83.8% (83.4 – 84.2) | 1.3% (1.3 – 1.3)    | 88.1% (87.5 – 88.7) | 2.2% (2.2 – 2.3)    |  |
| 65-74                                                             | 60.4% (60.0 – 60.8) | 1.1% (1.1 – 1.1) | 84.6% (84.2 – 84.9) | 3.0% (2.9 – 3.0)    | 88.7% (88.2 – 89.2) | 4.6% (4.6 – 4.7)    |  |
| 75-99                                                             | 69.9% (69.6 – 70.3) | 3.3% (3.3 – 3.3) | 88.0% (87.7 – 88.2) | 6.7% (6.6 – 6.8)    | 90.1% (89.8 – 90.4) | 8.2% (8.1 – 8.3)    |  |
| <b>Lung</b>                                                       |                     |                  |                     |                     |                     |                     |  |
| <i>Conditional 1 Year(s)</i>                                      |                     |                  |                     |                     |                     |                     |  |
| 15-44                                                             |                     |                  | 42.2% (39.1 – 45.3) | 0.3% (0.3 – 0.3)    | 46.5% (43.2 – 49.7) | 0.8% (0.8 – 0.9)    |  |
| 45-54                                                             |                     |                  | 59.5% (57.9 – 61.1) | 0.9% (0.8 – 0.9)    | 68.6% (67.0 – 70.3) | 1.8% (1.8 – 1.9)    |  |
| 55-64                                                             |                     |                  | 62.3% (61.4 – 63.2) | 2.0% (2.0 – 2.1)    | 72.2% (71.2 – 73.1) | 4.1% (4.0 – 4.2)    |  |
| 65-74                                                             |                     |                  | 62.8% (62.1 – 63.5) | 4.8% (4.8 – 4.9)    | 73.9% (73.1 – 74.7) | 9.2% (9.1 – 9.4)    |  |
| 75-99                                                             |                     |                  | 67.4% (66.6 – 68.1) | 12.6% (12.4 – 12.8) | 74.9% (74.2 – 75.7) | 18.4% (18.1 – 18.8) |  |
| <b>Lung</b>                                                       |                     |                  |                     |                     |                     |                     |  |
| <i>Conditional 5 Year(s)</i>                                      |                     |                  |                     |                     |                     |                     |  |
| 15-44                                                             |                     |                  |                     |                     | 7.5% (5.1 – 10.4)   | 0.8% (0.8 – 0.9)    |  |
| 45-54                                                             |                     |                  |                     |                     | 23.1% (20.5 – 25.7) | 2.5% (2.4 – 2.5)    |  |
| 55-64                                                             |                     |                  |                     |                     | 27.7% (25.9 – 29.6) | 5.9% (5.8 – 6.0)    |  |
| 65-74                                                             |                     |                  |                     |                     | 34.4% (32.5 – 36.2) | 13.5% (13.3 – 13.8) |  |
| 75-99                                                             |                     |                  |                     |                     | 37.8% (35.0 – 40.5) | 29.0% (28.3 – 29.8) |  |

Table S4: Cumulative mortality partitioned by deaths due to cancer and other causes, during the period 2011 to 2015, for lung cancer patients.

| Cumulative Mortality % at X years following a diagnosis of cancer |                  |                  |                     |                     |                     |                     |
|-------------------------------------------------------------------|------------------|------------------|---------------------|---------------------|---------------------|---------------------|
| Age Group                                                         | 1 Year(s)        |                  | 5 Year(s)           |                     | 10 Year(s)          |                     |
|                                                                   | Cancer Deaths    | Other Causes     | Cancer Deaths       | Other Causes        | Cancer Deaths       | Other Causes        |
| <b>Melanoma</b>                                                   |                  |                  |                     |                     |                     |                     |
| <i>Unconditional</i>                                              |                  |                  |                     |                     |                     |                     |
| 15-44                                                             | 1.3% (1.1 – 1.5) | 0.1% (0.1 – 0.1) | 5.3% (4.9 – 5.8)    | 0.4% (0.4 – 0.4)    | 7.6% (6.8 – 8.3)    | 1.1% (1.1 – 1.1)    |
| 45-54                                                             | 1.5% (1.2 – 1.7) | 0.2% (0.2 – 0.2) | 7.6% (7.0 – 8.2)    | 1.3% (1.3 – 1.3)    | 10.7% (9.6 – 11.9)  | 3.2% (3.1 – 3.2)    |
| 55-64                                                             | 2.0% (1.7 – 2.3) | 0.6% (0.6 – 0.6) | 10.1% (9.4 – 10.8)  | 3.4% (3.4 – 3.4)    | 13.3% (12.0 – 14.6) | 8.2% (8.1 – 8.2)    |
| 65-74                                                             | 2.5% (2.2 – 2.9) | 1.6% (1.6 – 1.6) | 11.6% (10.8 – 12.4) | 8.7% (8.7 – 8.8)    | 14.1% (12.4 – 16.0) | 21.0% (20.8 – 21.2) |
| 75-99                                                             | 5.2% (4.7 – 5.8) | 6.9% (6.9 – 6.9) | 18.0% (17.0 – 19.1) | 29.5% (29.2 – 29.7) | 21.8% (19.7 – 23.9) | 51.0% (50.4 – 51.7) |
| <b>Melanoma</b>                                                   |                  |                  |                     |                     |                     |                     |
| <i>Conditional 1 Year(s)</i>                                      |                  |                  |                     |                     |                     |                     |
| 15-44                                                             |                  |                  | 4.1% (3.7 – 4.5)    | 0.4% (0.4 – 0.4)    | 6.5% (5.9 – 7.0)    | 1.0% (1.0 – 1.0)    |
| 45-54                                                             |                  |                  | 6.3% (5.7 – 6.9)    | 1.1% (1.1 – 1.1)    | 9.3% (8.5 – 10.1)   | 3.0% (3.0 – 3.0)    |
| 55-64                                                             |                  |                  | 8.3% (7.7 – 9.0)    | 2.9% (2.8 – 2.9)    | 11.5% (10.7 – 12.4) | 7.7% (7.6 – 7.7)    |
| 65-74                                                             |                  |                  | 9.4% (8.7 – 10.2)   | 7.5% (7.5 – 7.5)    | 12.5% (11.4 – 13.7) | 20.0% (19.9 – 20.2) |
| 75-99                                                             |                  |                  | 14.6% (13.5 – 15.7) | 25.7% (25.5 – 25.9) | 19.3% (17.7 – 20.9) | 50.0% (49.3 – 50.6) |
| <b>Melanoma</b>                                                   |                  |                  |                     |                     |                     |                     |
| <i>Conditional 5 Year(s)</i>                                      |                  |                  |                     |                     |                     |                     |
| 15-44                                                             |                  |                  |                     |                     | 2.5% (2.1 – 2.9)    | 0.7% (0.7 – 0.7)    |
| 45-54                                                             |                  |                  |                     |                     | 3.3% (2.7 – 4.0)    | 2.1% (2.1 – 2.1)    |
| 55-64                                                             |                  |                  |                     |                     | 3.6% (2.9 – 4.4)    | 5.4% (5.4 – 5.5)    |
| 65-74                                                             |                  |                  |                     |                     | 3.7% (2.7 – 4.9)    | 15.1% (15.0 – 15.2) |
| 75-99                                                             |                  |                  |                     |                     | 7.9% (6.4 – 10.1)   | 40.6% (40.1 – 41.1) |

Table S5: Cumulative mortality partitioned by deaths due to cancer and other causes, during the period 2011 to 2015, for melanoma patients.

| Cumulative Mortality % at X years following a diagnosis of cancer |                     |                     |                     |                     |                     |                     |
|-------------------------------------------------------------------|---------------------|---------------------|---------------------|---------------------|---------------------|---------------------|
| Age Group                                                         | 1 Year(s)           |                     | 5 Year(s)           |                     | 10 Year(s)          |                     |
|                                                                   | Cancer Deaths       | Other Causes        | Cancer Deaths       | Other Causes        | Cancer Deaths       | Other Causes        |
| <b>Prostate</b>                                                   |                     |                     |                     |                     |                     |                     |
| <i>Unconditional</i>                                              |                     |                     |                     |                     |                     |                     |
| 15-54                                                             | 1.4% (1.2 – 1.8)    | 0.3% (0.3 – 0.3)    | 7.5% (6.8 – 8.2)    | 1.9% (1.9 – 1.9)    | 10.5% (9.2 – 11.8)  | 4.8% (4.7 – 4.8)    |
| 55-64                                                             | 1.2% (1.0 – 1.3)    | 0.8% (0.8 – 0.8)    | 7.1% (6.7 – 7.4)    | 4.6% (4.6 – 4.6)    | 10.3% (9.6 – 11.1)  | 11.2% (11.2 – 11.2) |
| 65-74                                                             | 1.7% (1.5 – 1.8)    | 1.9% (1.9 – 1.9)    | 7.8% (7.5 – 8.1)    | 10.9% (10.9 – 11.0) | 11.9% (11.2 – 12.6) | 25.6% (25.5 – 25.7) |
| 75-84                                                             | 5.4% (5.1 – 5.6)    | 5.0% (5.0 – 5.0)    | 17.9% (17.4 – 18.4) | 24.5% (24.4 – 24.6) | 25.5% (24.5 – 26.5) | 46.1% (45.8 – 46.4) |
| 85-99                                                             | 20.9% (20.1 – 21.7) | 11.8% (11.8 – 11.9) | 39.9% (38.8 – 41.0) | 39.5% (38.9 – 40.0) | 44.9% (43.5 – 46.3) | 51.9% (50.9 – 52.8) |
| <b>Prostate</b>                                                   |                     |                     |                     |                     |                     |                     |
| <i>Conditional 1 Year(s)</i>                                      |                     |                     |                     |                     |                     |                     |
| 15-54                                                             |                     |                     | 6.2% (5.6 – 6.8)    | 1.6% (1.6 – 1.6)    | 10.4% (9.4 – 11.4)  | 4.5% (4.5 – 4.5)    |
| 55-64                                                             |                     |                     | 6.0% (5.7 – 6.3)    | 3.9% (3.9 – 3.9)    | 9.8% (9.4 – 10.3)   | 10.6% (10.5 – 10.6) |
| 65-74                                                             |                     |                     | 6.4% (6.1 – 6.7)    | 9.4% (9.3 – 9.4)    | 11.0% (10.5 – 11.4) | 24.5% (24.4 – 24.6) |
| 75-84                                                             |                     |                     | 14.0% (13.5 – 14.5) | 21.8% (21.7 – 21.8) | 23.2% (22.5 – 24.0) | 46.0% (45.7 – 46.2) |
| 85-99                                                             |                     |                     | 28.3% (26.9 – 29.7) | 41.1% (40.5 – 41.6) | 35.6% (34.1 – 37.0) | 59.5% (28.4 – 60.7) |
| <b>Prostate</b>                                                   |                     |                     |                     |                     |                     |                     |
| <i>Conditional 5 Year(s)</i>                                      |                     |                     |                     |                     |                     |                     |
| 15-54                                                             |                     |                     |                     |                     | 4.6% (3.8 – 5.5)    | 3.1% (3.1 – 3.1)    |
| 55-64                                                             |                     |                     |                     |                     | 4.2% (3.8 – 4.6)    | 7.4% (7.4 – 7.4)    |
| 65-74                                                             |                     |                     |                     |                     | 5.5% (5.0 – 5.9)    | 18.0% (18.0 – 18.1) |
| 75-84                                                             |                     |                     |                     |                     | 14.4% (13.5 – 15.2) | 37.7% (37.4 – 37.9) |
| 85-99                                                             |                     |                     |                     |                     | 23.7% (20.7 – 26.8) | 60.3% (58.4 – 62.0) |

Table S6: Cumulative mortality partitioned by deaths due to cancer and other causes, during the period 2011 to 2015, for male prostate cancer patients.
